# Supplementary material for: Direct observation of ion cyclotron damping of turbulence in Earth’s magnetosheath plasma
Source: PubMed Central journal article supplement — Nat Commun. 2024 Oct 7;15:7870. doi: 10.1038/s41467-024-52125-8 (PMC11458859; doi:10.1038/s41467-024-52125-8), 2024-10-07
Supplement: 41467_2024_52125_MOESM1_ESM.pdf [file 41467_2024_52125_MOESM1_ESM.pdf]

1                               Supplementary information for

2                               **Direct observation of ion cyclotron damping of**  
3 **turbulent energy in Earth’s magnetosheath plasma**

4  
5                               August 4, 2024

6                               A. S. Afshari, G. G. Howes, J. R. Shuster, K. G. Klein, D. McGinnis, M. M. Martinović,  
7                               S. A. Boardsen, C. R. Brown, R. Huang, D. P. Hartley, C. A. Kletzing

8                               **Corresponding author:** [arya-afshari@uiowa.edu](mailto:arya-afshari@uiowa.edu)

## 9 S1. Linear Kinetic Theory Prediction of Velocity-Space Signatures of Ion Cyclotron Damp- 10 ing

11 Here we present an explanation of the velocity-space signatures for ion cyclotron damping of  
12 an Alfvén/ion cyclotron wave using the self-consistently determined wave eigenfunction using  
13 the PLUME linear Vlasov-Maxwell dispersion relation solver [s1], which predicts the complex  
14 eigenfrequency  $\omega + i\gamma$  given the wavevector and plasma parameters. We choose a fiducial case  
15 of a fully ionized, hydrogenic plasma with isotropic Maxwellian ion and electron velocity dis-  
16 tributions and plasma parameters  $\beta_i = 1$ ,  $T_i/T_e = 1$ ,  $v_{ti}/c = 10^{-4}$ , and  $m_i/m_e = 1836$ . In  
17 Fig. S1, for the Alfvén/ion cyclotron wave with wavevector  $\mathbf{k} = k_{\perp}\hat{\mathbf{e}}_{\perp 1} + k_{\parallel}\hat{\mathbf{e}}_{\parallel}$ , we present (a)  
18 the normalized real wave frequency  $\omega/\Omega_i$  (black) compared to an analytical approximation (red  
19 dashed) inspired by the cold plasma ion cyclotron wave dispersion relation [s2, s3],

$$\frac{\omega}{\Omega_i} = \frac{k_{\parallel}d_i}{2} \left( \frac{v_{A*}}{v_A} \right) \left[ \sqrt{(k_{\parallel}d_i)^2(v_{A*}/v_A)^2 + 4} - (k_{\parallel}d_i)(v_{A*}/v_A) \right]^{1/2} \quad (\text{S1})$$

20 with a correction for the phase speed of the Alfvén wave due to pressure anisotropy  $v_{A*}$  relative  
21 to the standard Alfvén speed

$$\frac{v_{A*}}{v_A} = \left[ 1 + \sum_s \frac{\beta_{\parallel s}}{2} \left( \frac{T_{\perp s}}{T_{\parallel s}} - 1 \right) \right]^{1/2}. \quad (\text{S2})$$

22 Note that, at large scales where  $k_{\parallel}d_i \ll 1$ , a temperature anisotropy with  $T_{\perp s}/T_{\parallel s} > 1$  increases  
23 the wave phase velocity and  $T_{\perp s}/T_{\parallel s} < 1$  decreases the phase velocity relative to the Alfvén  
24 velocity  $v_A$  in an isotropic pressure plasma. Here  $d_i = c/\omega_{pi} = v_A/\Omega_i$  is the usual definition  
25 of the ion inertial length, where  $c$  is the speed of light,  $\omega_{pi} = \sqrt{n_i q_i^2 / (\epsilon_0 m_i)}$  is the ion plasma  
26 frequency, and  $\Omega_i = q_i B_0 / m_i$  is the ion cyclotron frequency. We see that the analytical ap-  
27 proximation for the frequency is accurate up to  $k_{\parallel}d_i \lesssim 0.3$ , where the damping is weak with  
28  $-\gamma/\omega < 0.1$ .

29 In Fig. S1(b), we plot the normalized total collisionless damping rate  $-\gamma/\omega$  (black dashed)  
30 for  $k_{\perp}d_i = 10^{-2}$  over a range  $10^{-2} \leq k_{\parallel}d_i \leq 10$ . In addition, we also show in (b) the total nor-  
31 malized ion damping rate  $\gamma_i/\omega$  (thin red) and total normalized electron damping rate  $\gamma_e/\omega$  (thin  
32 blue) are plotted, showing clearly that the total damping rate for this ion cyclotron wave (ICW)  
33 is dominated by the ions. Furthermore, the contributions to the collisionless damping on the  
34 ions are calculated separately, showing at  $k_{\parallel}d_i \lesssim 0.2$  nearly equal contributions from ion Lan-  
35 dau damping  $\gamma_{i,LD}$  (red short dashed) and ion transit-time damping  $\gamma_{i,TTD}$  (red long dashed);  
36 at  $k_{\parallel}d_i \gtrsim 0.2$ , ion cyclotron damping  $\gamma_{i,CD}$  (green dashed) becomes the dominant collisionless

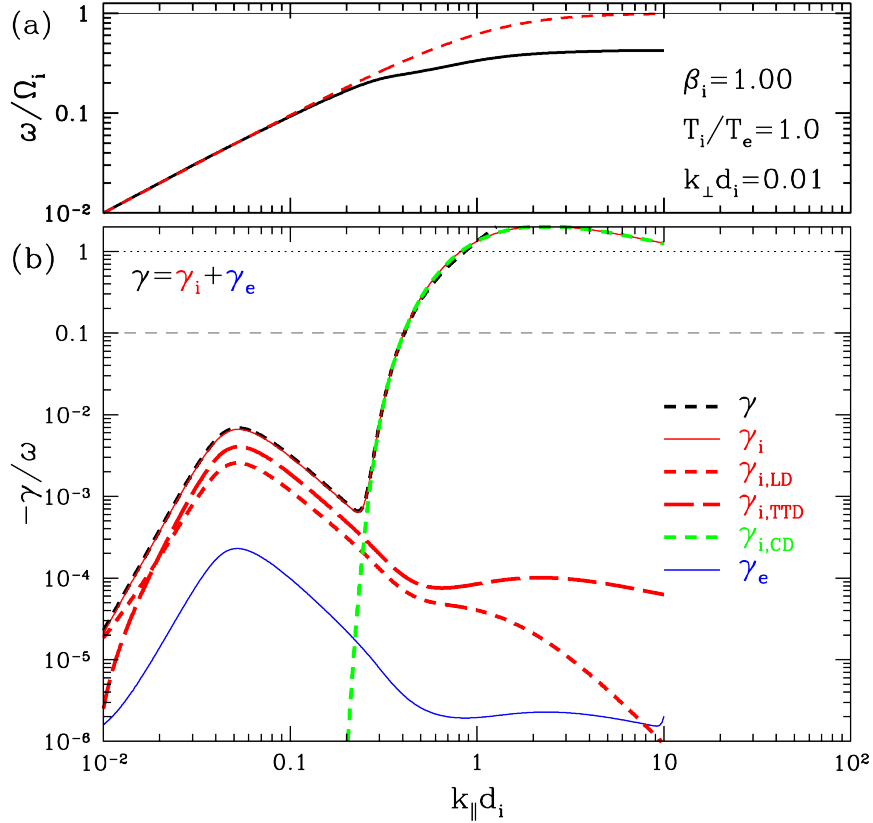

Figure S1: **Frequency and damping rate of Alfvén/ion cyclotron wave.** In a Maxwellian plasma with  $\beta_i = 1$ ,  $T_i/T_e = 1$ ,  $v_{ti}/c = 10^{-4}$ , and  $m_i/m_e = 1836$ , we plot (a) the normalized frequency  $\omega/\Omega_i$  (black) and the analytical approximation by eq. (S1) (red dashed) and (b) normalized total collisionless damping rate  $\gamma/\omega$  (black dashed) for  $k_{\perp} d_i = 10^{-2}$  over a range  $10^{-2} \leq k_{\parallel} d_i \leq 10$ . Separate contributions to the total collisionless damping rate  $\gamma/\omega$  (black dashed) are shown: total ion damping  $\gamma_i$  (thin red); total electron damping rate  $\gamma_e$  (thin blue); ion Landau damping  $\gamma_{i,LD}$  (red short dashed); ion transit-time damping  $\gamma_{i,TTD}$  (red long dashed); and ion cyclotron damping  $\gamma_{i,CD}$  (green dashed).

37 damping mechanism. Significant damping rates with  $-\gamma/\omega \gtrsim 0.1$  occur for  $k_{\parallel} d_i \gtrsim 0.4$ , where  
 38 ion cyclotron damping dominates.

39 To predict the velocity-space signatures of ion cyclotron damping in the perpendicular ve-  
 40 locity space  $(v_{\perp 1}, v_{\perp 2})$ , we employ the analytical model given by (6) and (7) in the manuscript  
 41 with the complex phase and amplitude relationships for the perpendicular components of the  
 42 electric field and ion fluid velocity derived directly from the linear eigenfunctions calculated by  
 43 the PLUME solver. For this calculation, we choose a wave amplitude given by  $E_{\perp 1}/(v_A B_0) =$

44 0.3. In Fig. S2, we plot the perpendicular velocity-space signatures  $C_{E_{\perp 1}}(v_{\perp 1}, v_{\perp 2})$  (left col-  
 45 umn) and  $C_{E_{\perp 2}}(v_{\perp 1}, v_{\perp 2})$  (right column) for the ICW from Fig. S1 with  $k_{\parallel}d_i = 0.4$  (top row),  
 46  $k_{\parallel}d_i = 0.8$  (middle row), and  $k_{\parallel}d_i = 1.2$  (bottom row). Note that these predicted velocity-  
 47 space signatures are time-averaged over one full period of the ICW, thus they contain the net  
 48 effect of the work done by the perpendicular electric field on the ions. In all cases, we observe  
 49 quadrupolar signatures dominated by energy transfer to the ions (red), with an increasing skew  
 50 to the quadrupolar pattern with increasing  $k_{\parallel}d_i$ , which arises from the phase shift between the  
 51 perpendicular electric field and the perpendicular ion bulk velocity decreasing from nearly out-  
 52 of-phase with  $\delta_1 = \delta_2 = -0.49\pi$  at  $k_{\parallel}d_i = 0.4$  to more in-phase with  $\delta_1 = \delta_2 = -0.27\pi$  at  
 53  $k_{\parallel}d_i = 1.2$ . All cases have  $\phi = -0.5\pi$ . It is worth noting that the quantitative skew in the pat-  
 54 tern provides a potential means to determine the parallel wavenumber of the ICW undergoing  
 55 damping.

56 To understand why ion cyclotron damping creates the quadrupolar pattern in perpendic-  
 57 ular velocity space  $(v_{\perp 1}, v_{\perp 2})$ , it is necessary to look at the instantaneous work done by the  
 58 perpendicular electric field over the full ICW period  $T$ . In Fig. S3, we plot the instantaneous  
 59 field-particle correlation for  $C_{E_{\perp 1}}(v_{\perp 1}, v_{\perp 2})$  for the  $k_{\parallel}d_i = 0.8$  case at eight different, equally  
 60 spaced phases of the wave, parameterized by  $t/T = \omega t/2\pi$ . In each panel, we plot the mean  
 61 perpendicular bulk velocity (star) and a circle of radius one thermal velocity  $\Delta v_{\perp}/v_{ti} = 1$  to  
 62 indicate the ion distribution at that time throughout its circularly polarized orbit. Each case  
 63 yields a bipolar signature of energization by the  $E_{\perp 1}$  component of the electric field. Averaging  
 64 over the full  $2\pi$  phase of the ion cyclotron period leads to the quadrupolar signature seen in  
 65 Fig. S2(c), where the energization of the ions is dominated by positive (red) transfer to the ions  
 66 in the second and fourth quadrants of that plot.

67 Note that the total energization of the ions by the perpendicular electric field over perpen-  
 68 dicular velocity space is given by the sum of  $C_{E_{\perp}}(v_{\perp 1}, v_{\perp 2}) = C_{E_{\perp 1}} + C_{E_{\perp 2}}$ , leading to the  
 69 total ion energization pattern in perpendicular velocity space  $(v_{\perp 1}, v_{\perp 2})$  shown in Fig. S4(a) for  
 70 the  $k_{\parallel}d_i = 0.8$  case. If the full factor of  $v^2$  in the electric field term of Eq. (1) is used in the  
 71 definition of the perpendicular field-particle correlation, given by

$$C_{E_{\perp s}}^{(v^2)}(\mathbf{r}_0, \mathbf{v}, t; \tau) = \frac{1}{\tau} \int_{t-\tau/2}^{t+\tau/2} dt' \frac{-q_s v^2}{2} \left( \frac{\partial f_s(\mathbf{r}_0, \mathbf{v}, t')}{\partial v_{\perp 1}} E_{\perp 1}(\mathbf{r}_0, t') + \frac{\partial f_s(\mathbf{r}_0, \mathbf{v}, t')}{\partial v_{\perp 2}} E_{\perp 2}(\mathbf{r}_0, t') \right), \quad (\text{S3})$$

72 we obtain the perpendicular field-particle correlation in Fig. S4(b). This alternative version in  
 73 panel (b) corresponds to an intuitive expectation for ion cyclotron damping in which ions with  
 74  $v_{\perp}/v_{ti} < 1$  are accelerated to a perpendicular velocity with  $v_{\perp}/v_{ti} > 1$ , generating the red  
 75 circular pattern with a blue center. Note, however, that, when integrated over velocity space, the

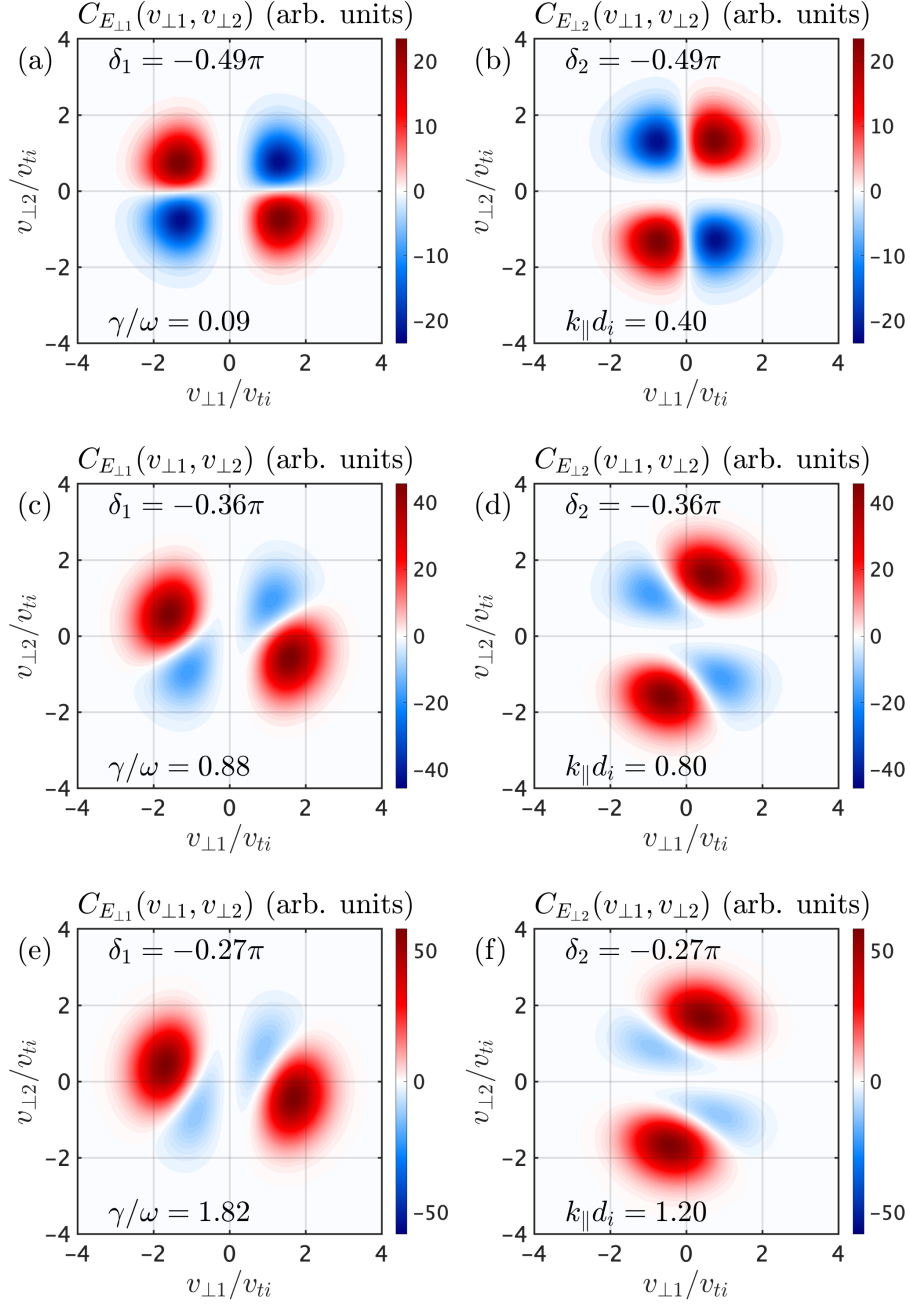

Figure S2: **Velocity-space signatures of ion cyclotron damping.** The perpendicular velocity-space signatures  $C_{E_{\perp 1}}(v_{\perp 1}, v_{\perp 2})$  (left column) and  $C_{E_{\perp 2}}(v_{\perp 1}, v_{\perp 2})$  (right column) for the ion cyclotron wave from Fig. S1 with  $k_{\parallel}d_i = 0.4$  (a,b),  $k_{\parallel}d_i = 0.8$  (c,d), and  $k_{\parallel}d_i = 1.2$  (e,f).

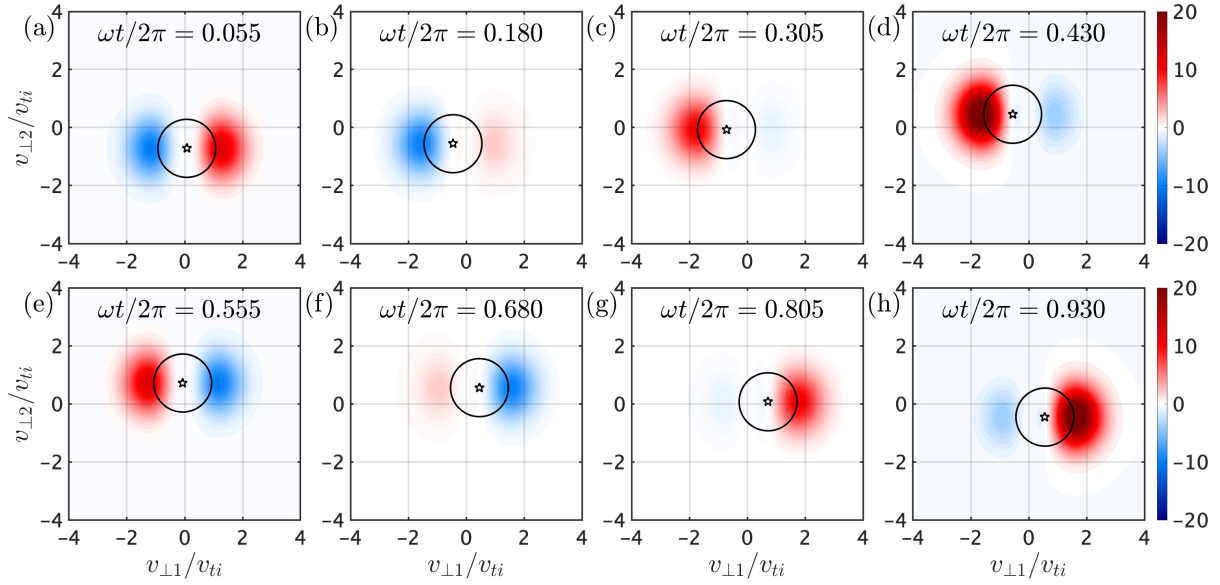

Figure S3: **Instantaneous correlation by phase.** The instantaneous field-particle correlation  $C_{E_{\perp 1}}(v_{\perp 1}, v_{\perp 2})$  in perpendicular velocity space at 8 equally spaced phases of ion cyclotron wave  $\omega t/2\pi$ . The summed effect over the full  $2\pi$  phase of the ion cyclotron wave yields the quadrupolar signature seen in Fig. S2(c).

76 net rate of ion energization is exactly the same in both panels (a) and (b) because, for example,  
 77 the  $v_{\perp 2}^2$  contribution to  $v^2$  yields zero when the correlation is integrated over  $v_{\perp 1}$ .

78 It is worthwhile noting here that if the ion velocity distribution is separated into the sum  
 79 of a steady equilibrium and a time-varying perturbation,  $f_i(\mathbf{v}, t) = f_{i0}(\mathbf{v}) + \delta f_i(\mathbf{v}, t)$ , then the  
 80 velocity-space signature of the perpendicular field-particle correlation using the full ion veloc-  
 81 ity distribution  $f_i(\mathbf{v}, t)$  is exactly the same as that using the perturbed ion velocity distribution  
 82  $\delta f_i(\mathbf{v}, t)$  as long as (i) the correlation is taken over an integral number of wave periods and (ii)  
 83 the damping rate is weak  $-\gamma/\omega \ll 1$  so that the oscillating energy transfer of the undamped  
 84 wave motion cancels out between the first and second halves of the wave period. Thus, observa-  
 85 tional field-particle correlations using the full ion velocity distribution  $f_i(\mathbf{v}, t)$  can be compared  
 86 directly to the predictions from field-particle correlation calculations that use the perturbed ion  
 87 velocity distribution  $\delta f_i(\mathbf{v}, t)$ .

88  
 89 **S2. Ion Cyclotron Wave Modes Driven Unstable by the Alfvén/Ion Cyclotron Instability**  
 90 In the investigation of the source of the ICW observed to damp in the *MMS* measurements,  
 91 it is worthwhile to determine what are the typical wave vectors of the modes that may be

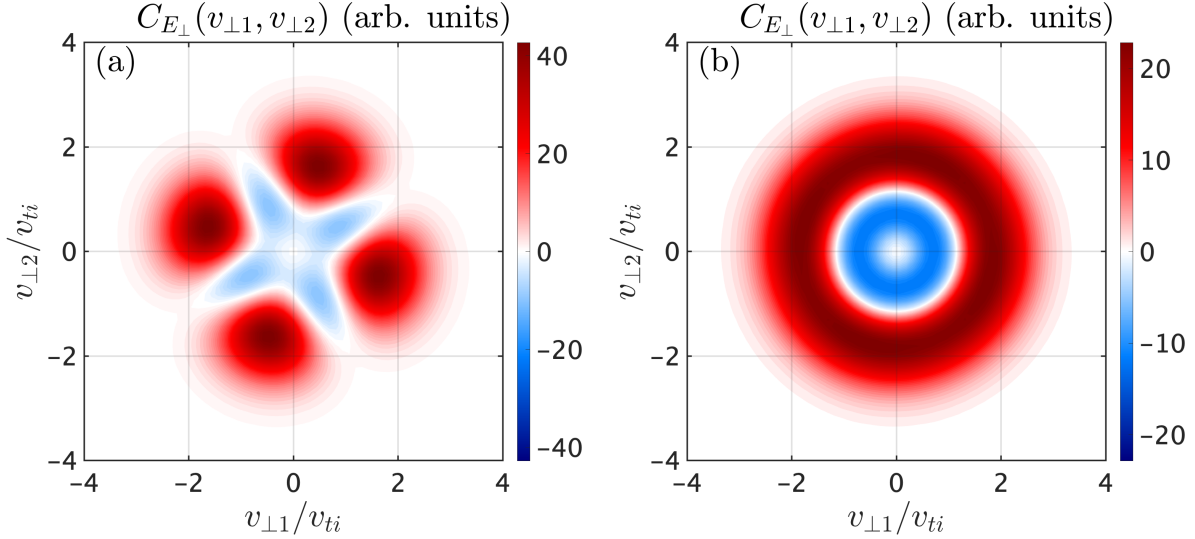

Figure S4: **Total perpendicular velocity-space signature.** (a)  $C_{E_{\perp}}(v_{\perp 1}, v_{\perp 2})$  using the component field-particle correlation defined in Eq. (2) and (b)  $C_{E_{\perp}}^{(v^2)}(\mathbf{r}_0, \mathbf{v})$  using the full  $v^2$  factor in the correlation definition in eq. (S3).

92 driven unstable by the ion temperature anisotropy. Using the PLUME linear Vlasov-Maxwell  
 93 dispersion relation solver [s1], we compute the growth or damping rates of wave modes over  
 94 the normalized wavevector<sup>1</sup> range  $10^{-2} \leq k_{\perp} \rho_{\perp i} \leq 10$  and  $10^{-2} \leq k_{\parallel} \rho_{\perp i} \leq 10$ , where  
 95  $\rho_{\perp i} = v_{\perp ti} / \Omega_i = d_i (T_{\perp i} / T_{\parallel i})^{1/2} \beta_{\parallel i}^{1/2}$  and the perpendicular ion thermal velocity is given by  
 96  $v_{\perp ti}^2 = 2T_{\perp i} / m_i$ . We model a fully ionized, hydrogenic plasma with bi-Maxwellian veloc-  
 97 ity distributions and mass ratio  $m_i / m_e = 1836$ , and we compute the dimensionless plasma  
 98 parameters using the MMS measurements during the interval:  $\beta_{\parallel i} = 0.383$ ,  $T_{\parallel i} / T_{\parallel e} = 6.84$ ,  
 99  $T_{\perp i} / T_{\parallel i} = 2.43$ ,  $T_{\perp e} / T_{\parallel e} = 0.973$ , and  $v_{\parallel ti} / c = 7.34 \times 10^{-4}$ , where the parallel ion thermal  
 100 velocity is given by  $v_{\parallel ti}^2 = 2T_{\parallel i} / m_i$ . For the Alfvén/ion cyclotron wave mode, the resulting nor-  
 101 malized growth rates  $\gamma / \Omega_i$  are plotted linearly in the left panel of Fig. S5 and the normalized  
 102 damping rates  $-\gamma / \Omega_i$  are plotted logarithmically in the right panel. It is clear that the measured  
 103 ion temperature anisotropy leads to unstable growth of the ICWs with  $0.3 \lesssim k_{\parallel} \rho_{\perp i} \lesssim 1.0$  and  
 104  $k_{\perp} < k_{\parallel}$ ; for the most rapidly growing modes, the unstable wave vectors are predominantly

<sup>1</sup>Note that the ion thermal Larmor radius  $\rho_{\perp i}$  is the natural length scale to normalize  $k_{\perp}$ , and we choose to normalize  $k_{\parallel}$  by the same characteristic length so the wavevector anisotropy  $k_{\parallel} / k_{\perp}$  of a wave mode is immediately evident from the plot. Choosing a parallel wavevector normalization of  $k_{\parallel} d_i$  would include scalings of  $T_{\perp i} / T_{\parallel i}$  and  $\beta_{\parallel i}$  between the horizontal and vertical axes.

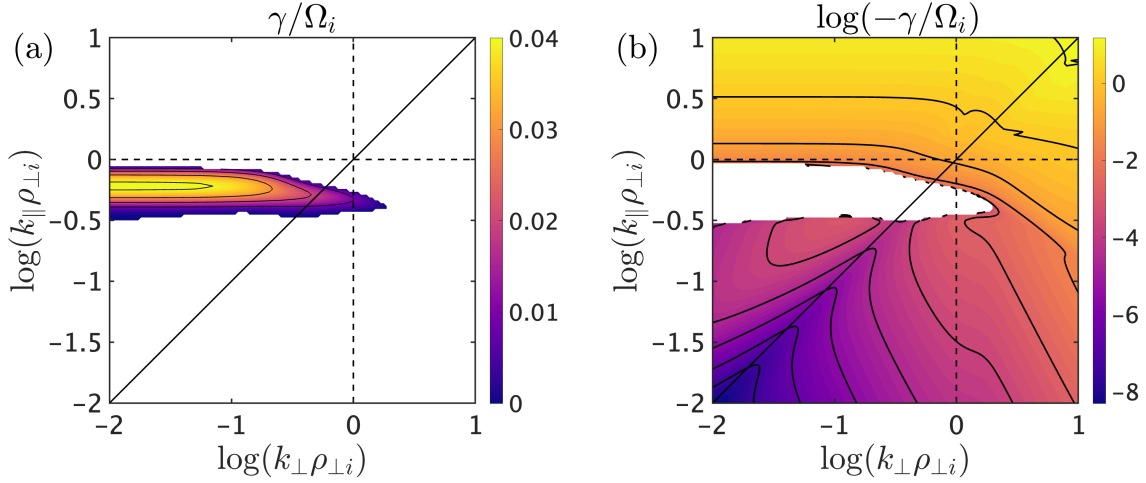

Figure S5: **Growth and Damping Rates for Alfvén/ion cyclotron wave.** (a) Linearly plotted normalized growth  $\gamma/\Omega_i$  and (b) logarithmically plotted normalized damping rates  $\log(-\gamma/\Omega_i)$  for the Alfvén/ion cyclotron wave mode as a function of  $(k_{\parallel}\rho_{\perp i}, k_{\perp}\rho_{\perp i})$  for the anisotropic temperatures measured in the MMS interval under investigation.

105 parallel with  $k_{\perp} \ll k_{\parallel}$ .

106 The direct measurements by *MMS* in the interval under investigation show a net loss of wave  
 107 energy to the ions (see Fig. 4c), manifesting collisionless damping of the measured ICWs rather  
 108 than unstable growth. In kinetic theory, the real frequency of a wave mode is typically a function  
 109 of the lowest order moments of the distribution (density, bulk velocity, and temperature), but the  
 110 collisionless growth or damping rates can be a sensitive function of the slope of the distribution  
 111 function at a resonant velocity [s4]. Furthermore, as shown by the contours of the ion velocity  
 112 distribution in Fig. 2g being fit by circular contours about a parallel wave phase velocity  $v_{ph} =$   
 113  $0.7v_A$ , the ion velocity distributions in the magnetosheath plasma may not be well approximated  
 114 by the idealized bi-Maxwellian form assumed in the *PLUME* solver, leading to a difference in  
 115 the resulting collisionless damping or growth rates. To determine the ion cyclotron damping  
 116 rates for plasma parameters similar to the *MMS* interval studied here, we also compute the  
 117 frequencies and damping rates using the *PLUME* solver by taking the ion temperatures to be  
 118 isotropic,  $T_{\perp i}/T_{\parallel i} = 1$ , with all of the other parameters held fixed.

119 In Fig. 6a of the manuscript, we plot a comparison of the normalized ICW frequencies  
 120  $\omega/\Omega_i$  for the isotropic (dotted) and anisotropic (dashed) ion temperature cases vs.  $k_{\parallel}d_i$ ; it is  
 121 clear that the temperature anisotropy leads to only a relatively small (less than a factor of two)  
 122 quantitative change in the wave frequency at  $k_{\parallel}d_i > 0.3$ . This supports the notion that the  
 123 real frequency of the wave mode is less sensitive to the details of the velocity distribution.



124 In Fig. 6b of the manuscript, we plot the normalized damping rate  $-\gamma/\omega$  for the isotropic case  
 125 with  $T_{\perp i}/T_{\parallel i} = 1$  (dotted) and the normalized damping rate  $-\gamma/\omega$  (blue dashed) and normalized  
 126 growth rate  $\gamma/\omega$  (red dashed) for the anisotropic case with  $T_{\perp i}/T_{\parallel i} = 2.43$ . The damped regions  
 127 for both cases show a similar qualitative behavior. Over the narrow parallel wavevector range  
 128  $0.3 \lesssim k_{\parallel} d_i \lesssim 0.9$ , the anisotropic case is unstable but the isotropic case is damped, with similar  
 129 absolute values of the growth or damping rates. And, it is worth noting that the region of  
 130 significant damping ( $-\gamma/\omega > 0.1$ ) in the isotropic ion temperature case occurs for  $k_{\parallel} d_i \gtrsim 0.4$ ,  
 131 similar to the fiducial case of ion cyclotron damping explored in Sec. S1. Note also that the  
 132 agreement of the damping rate at  $k_{\parallel} d_i \lesssim 0.3$  between the isotropic and the anisotropic cases  
 133 makes sense because the damping in that regime is due to Landau and transit-time damping,  
 134 both of which depend only on the  $\beta_{\parallel p}$ , which does not change.

135 To assess the impact of the distribution function not being well fit by a bi-Maxwellian distri-  
 136 bution (as assumed by the PLUME solver), we also calculate the linear dispersion relation via a  
 137 numerical integration using the Arbitrary Linear Plasma Solver (ALPS) [s5], which determines  
 138 complex linear wave eigenfrequencies for arbitrary gyrotropic equilibrium velocity distribu-  
 139 tions. The growth rates to these solutions are shown in Fig. S6. As inputs to this calculation, we  
 140 averaged the observed ion distribution function over the entire 77 second interval considered in  
 141 the manuscript, as well as shorter averaging intervals of 7 seconds and 1 second. The observed  
 142 distributions are interpolated onto a Cartesian grid in  $(v_{\perp}/v_A, v_{\parallel}/v_A)$  using a smooth-plate in-  
 143 terpolation method covering a range of  $v_{\parallel} \in [-3, 3]v_A$  and  $v_{\perp} \in [0, 3]v_A$ . We calculated the  
 144 parallel propagating solutions for the Alfvén/ion cyclotron mode, keeping  $k_{\perp} d_i = 10^{-3}$  con-  
 145 stant with varying  $k_{\parallel} d_i$ . The forward and backwards solutions are considered separately, as  
 146 asymmetries in the distribution lead to different behaviors for the two modes.

147 For the 77 second averaged distribution, the forward Alfvén solution remains broadly un-  
 148 stable (similar to the PLUME results), while the region of wavevector support for the backwards  
 149 solution is decreased, as is the peak growth rate. When considering the shorter intervals, we see  
 150 significant variability in the wavemodes that are unstable, at times nearly suppressing the insta-  
 151 bility altogether. The decrease of the instability growth rates for shorter measurement intervals  
 152 is strong evidence that measured intervals yield a larger perpendicular “apparent temperature”  
 153 than actually exists in the plasma [s5]. The instrumental effect of “apparent temperature” arises  
 154 when wave activity, which leads to significant plasma wave motions perpendicular to the mag-  
 155 netic field, as is the case for both Alfvén and ion cyclotron waves, artificially broadens the  
 156 measured velocity distribution. This may be an explanation for why linear dispersion relation  
 157 calculations suggest that the ion cyclotron waves are unstable for this interval, but that the direct  
 158 field-particle correlation measurements show instead a transfer of energy from the waves to the  
 159 ions, leading to wave damping rather than growth.

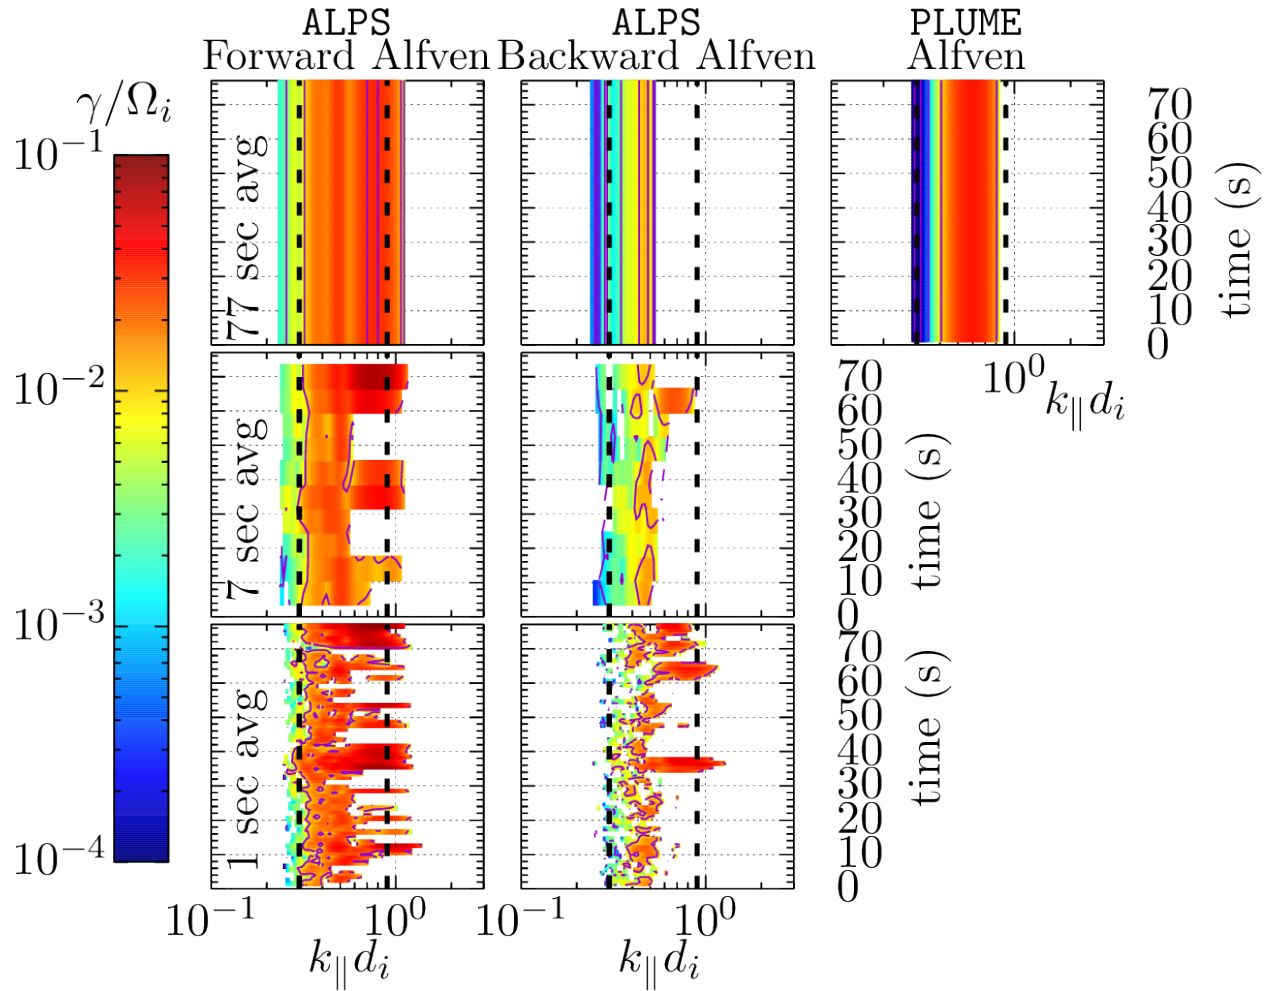

Figure S6: **Instability growth rates as a function of time average interval.** Growth rates for parallel propagating Alfvén/ion cyclotron waves as a function of  $k_{\parallel} d_i$  and fixed  $k_{\perp} d_i = 10^{-3}$ , calculated using the PLUME bi-Maxwellian linear dispersion solver for the anisotropic temperatures presented in Fig. S5 (top right) and the ALPS linear dispersion solver (left and central columns) for three different averaging intervals (77 seconds - top, 7 seconds- middle, 1 second- bottom). The range of unstable modes identified by PLUME is overplotted as dashed lines in the other panels.

160 Another issue besides the apparent temperature that may impact the predictions of whether  
 161 the observed ion cyclotron waves in the turbulence are damped or growing is a comparison of  
 162 the unstable wave growth rates compared to the ion cyclotron wave periods themselves. For  
 163 many cases of temperature anisotropy instabilities being triggered in space or astrophysical  
 164 plasmas, the unstable temperature anisotropy is driven by large-scale compressible fluctuations.  
 165 Because the instabilities typically grow on ion cyclotron timescales, as shown in Fig. S6, the  
 166 low-frequency of the large-scale fluctuations driving the temperature anisotropy leads to a rela-  
 167 tively steady background conditions in which the unstable wave can grow. Thus, linear disper-  
 168 sion relation solvers, such as PLUME and ALPS, which assume static equilibrium conditions,  
 169 provide a reasonable calculation of the growth or damping rates. In this observed interval in  
 170 the magnetosheath, however, the ion cyclotron wave is oscillating at  $\omega/\Omega_i \simeq 0.36$ , whereas the  
 171 peak instability growth rates are significantly slower with  $\gamma/\Omega_i \sim 0.04$ . Thus, the growth or  
 172 damping rates in observed turbulent plasma may not be the same as those calculated by these  
 173 linear dispersion relation solvers which assume static equilibrium conditions. This is another  
 174 potential explanation for why the dispersion relation solvers predict unstable wave growth, but  
 175 the observations clearly indicate wave damping.

### 176 S3. Estimation of Ion Cyclotron Wave Vector

177 If we assume that the ICW undergoing damping in the *MMS* observation can be characterized  
 178 by a single wave vector  $\mathbf{k}$  (which is not unreasonable considering the appearant dominance of  
 179 a single wave mode in the high-pass filtered electric and magnetic fields in Figure 2(d) and  
 180 (e)), we can estimate the spacecraft frame frequency  $\omega_{s/c}$  due to the sum of the plasma frame  
 181 frequency plus the Doppler shift associated with the flow  $\mathbf{U}$  of spatial fluctuations in the plasma  
 182 past the spacecraft, given by [s6]

$$\omega_{s/c} = \omega + \mathbf{k} \cdot \mathbf{U} \quad (\text{S4})$$

183 where  $\omega$  is the frequency of the wave in the plasma rest frame. The FAC coordinate system  
 184 defined in the Methods section is defined such that the  $\hat{\mathbf{e}}_{\perp 2}$  unit vector is perpendicular to the  
 185 plane of the mean magnetic field  $\mathbf{B}_0$  and mean ion flow velocity  $\mathbf{U}_{0i}$ . Averaged over the full  
 186  $\tau = 77$  s correlation interval, the mean magnetic field in GSE coordinates is  $\langle B_x, B_y, B_z \rangle_\tau =$   
 187  $(14.5, 27.7, 36.2)$  nT, and the mean ion bulk flow is  $\langle U_{i,x}, U_{i,y}, U_{i,z} \rangle_\tau = (-51.3, -98.3, -51.8)$  km/s.

188 To use the measured ICW frequency  $f_{ICW} = 0.26$  Hz to estimate the parallel wavenumber  
 189  $k_{\parallel} d_i$  of the wave, we first take a single, plane-wave vector of the form

$$\mathbf{k} = k_{\parallel} \hat{\mathbf{e}}_{\parallel} + k_{\perp} \cos \phi \hat{\mathbf{e}}_{\perp 1} + k_{\perp} \sin \phi \hat{\mathbf{e}}_{\perp 2}, \quad (\text{S5})$$

190 with components  $k_{\parallel}$  and  $k_{\perp}$  that are parallel and perpendicular to the mean magnetic field  
 191 direction  $\hat{\mathbf{e}}_{\parallel}$ , and  $\phi$  is the angle of the perpendicular component away from the  $\hat{\mathbf{e}}_{\perp 1}$  direction.

192 With the angle between  $\mathbf{B}_0$  and  $\mathbf{U}_{0i}$  given by  $\theta_{BU} = 156^\circ$ , substituting eq. (S5) into eq. (S4)  
 193 and normalizing appropriately into dimensionless quantities, we obtain

$$\frac{\omega_{s/c}}{\Omega_i} = \frac{\omega}{\Omega_i} + (k_{\parallel}d_i)(U_{0i}/v_A) \cos \theta_{BU} + (k_{\parallel}d_i)(U_{0i}/v_A) \sin \theta_{BU} (k_{\perp}/k_{\parallel}) \cos \phi \quad (\text{S6})$$

194 Here  $\omega/\Omega_i$  is the real frequency from the linear Vlasov-Maxwell dispersion relation for the  
 195 ICW (as shown in Fig. 6),  $k_{\parallel}d_i$  is the independent variable, and  $U_{0i}/v_A$  and  $\theta_{BU}$  are measured  
 196 directly from the measurements. We must vary the unknown parameters for the perpendicular  
 197 component of the wavevector  $(k_{\perp}d_i, \phi)$ , which we parameterize by the dimensionless quantities  
 198  $k_{\perp}/k_{\parallel}$  and  $\phi$ .

199 Since instability-driven ICWs have the most rapid growth rates with  $k_{\parallel} \gg k_{\perp}$ , as shown in  
 200 Fig. S5, we will assume values of the wavevector anisotropy in the range  $10^{-2} \leq k_{\perp}/k_{\parallel} \leq 1$ .  
 201 We will also allow the azimuthal angle to vary over the full range  $0 \leq \phi \leq 2\pi$ . Taking  
 202  $U_{0i} = 122$  km/s and  $v_A = 357$  km/s, we plot in Fig. S7 predictions of the normalized spacecraft-  
 203 frame frequency  $\omega_{s/c}/\Omega_i$  as a function of the normalized parallel wavenumber  $k_{\parallel}d_i$ . The first  
 204 two terms of eq. (S6), which do not depend on the perpendicular component of the wavevec-  
 205 tor, are plotted separately, showing the plasma frame frequency  $\omega/\Omega_i$  (black dashed) and the  
 206 Doppler-shifted parallel component of the wavevector  $(k_{\parallel}d_i)(U_{0i}/v_A) \cos \theta_{BU}$  (red dashed).  
 207 Here we take a specific value for the wave vector anisotropy  $k_{\perp}/k_{\parallel} = 0.25$  and allow  $\phi$  to  
 208 vary over the full  $2\pi$ . If the projection of the parallel wave phase velocity moves in the same  
 209 direction as the flow, the spacecraft-frame frequency  $\omega_{s/c}/\Omega_i$  is a sum of the plasma-frame  
 210 frequency and parallel Doppler shift (blue solid), and the range in yellow shows how the per-  
 211 pendicular component changes the result with  $k_{\perp}/k_{\parallel} = 0.25$  and  $0 \leq \phi \leq 2\pi$ . Similarly, if the  
 212 parallel wave phase velocity moves in the direction opposite the flow,  $\omega_{s/c}/\Omega_i$  is a difference  
 213 of the plasma-frame frequency and parallel Doppler shift (green solid), with variations due to  
 214 the possible variations of the perpendicular component spanned by the cyan range. The mea-  
 215 sured ICW frequency  $f_{ICW} = 0.26$  Hz, when normalized to the local ion cyclotron frequency  
 216  $f_{ci} = 0.73$  Hz, is indicated by the horizontal dotted line. The takeaway from Fig. S7 is that  
 217 the observed ICW frequency  $f_{ICW} = 0.26$  Hz can be explained by this modeling with parallel  
 218 wavenumber values that span the range  $0.5 \lesssim k_{\parallel}d_i \lesssim 1.5$  within the cyan range. This is con-  
 219 sistent with the modeling shown in Fig. 6 of the manuscript, where damping (for the isotropic  
 220 temperature case) has significant damping rates with  $-\gamma/\omega > 0.1$  for values  $k_{\parallel}d_i \gtrsim 0.6$ . There-  
 221 fore, we conclude that values of  $k_{\parallel}d_i \gtrsim 0.6$  are reasonable to use to make predictions of the  
 222 velocity-space signature of the ion cyclotron damping using linear Vlasov-Maxwell dispersion  
 223 relation solutions.

224

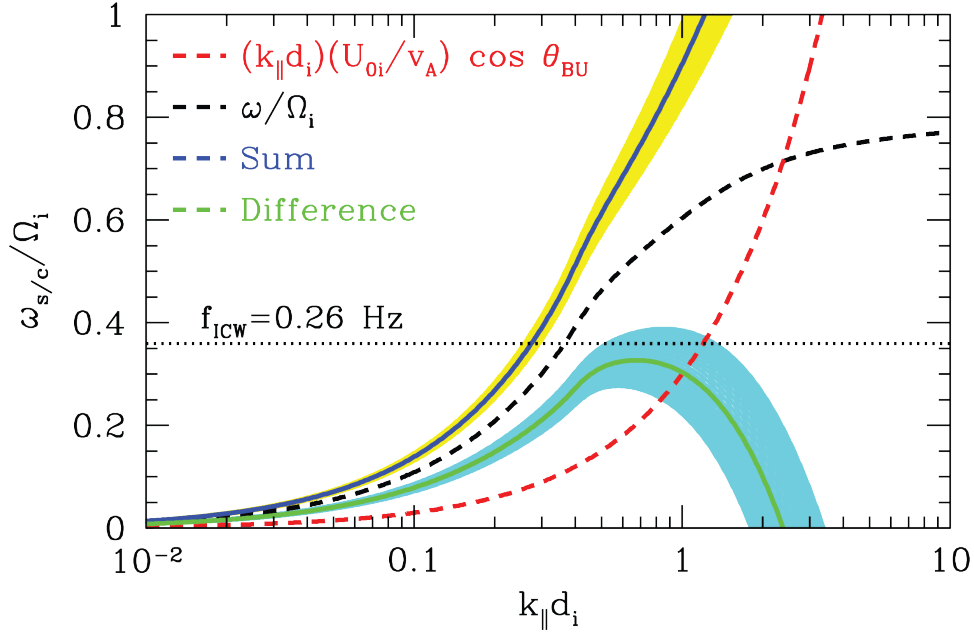

Figure S7: **Spacecraft-frame frequency of ion cyclotron wave.** Determination of the normalized spacecraft-frame frequency  $\omega_{s/c}/\Omega_i$  as a function of the normalized parallel wavenumber  $k_{\parallel}d_i$  from eq. (S6). We plot the plasma frame frequency  $\omega/\Omega_i$  (black dashed) and the Doppler-shifted parallel component of the wavevector  $(k_{\parallel}d_i)(U_{0i}/v_A) \cos \theta_{BU}$  (red dashed). The sum (blue solid) and difference (green solid) of the plasma-frame frequency and parallel Doppler shift are shown. When the contribution of the perpendicular component of the wavevector with  $k_{\perp}/k_{\parallel} = 0.25$  and  $0 \leq \phi \leq 2\pi$  is included, the resulting possible range of spacecraft-frame frequencies  $\omega_{s/c}/\Omega_i$  is given by the yellow range for the sum of the cyan range for the difference.

#### 225 S4. Estimation of Upstream Bow Shock Parameters

226 The ICWs observed in the *MMS* interval analyzed here are most likely to have been gener-  
 227 ated by a significant ion temperature anisotropy  $T_{\perp i}/T_{\parallel i} > 1$  through the Alfvén/ion cyclotron  
 228 instability [s7, s8]. An obvious candidate mechanism for the generation of an ion tempera-  
 229 ture anisotropy that exceeds the threshold for this instability [s8] is compression of the incom-  
 230 ing solar wind at Earth’s bow shock. For quasiperpendicular upstream bow shock conditions  
 231  $\theta_{Bn} > 45^\circ$ , one indeed expects the generation of an anisotropy in the sense of  $T_{\perp}/T_{\parallel} > 1$ .  
 232 Therefore, it is worthwhile investigating the conditions at the bow shock to determine whether  
 233 shock compression is likely to trigger the generation of the ICWs observed by *MMS* downstream  
 234 in the magnetosheath.

235 The burst-mode interval at 07:24:28 on 12 JAN 2016 investigated here occurs on the in-  
 236 bound pass from apogee to perigee, but the *MMS* spacecraft unfortunately did not cross the

237 bow shock on its previous passage through apogee, so a direct determination of the upstream  
 238 conditions of the shock—in particular the Alfvén Mach number  $M_A$  and shock normal angle  
 239  $\theta_{Bn}$  in the normal incidence frame—is not possible. Instead, we are forced to use the mag-  
 240 netic field direction upstream from an upstream solar wind monitor and the direction of the  
 241 bow shock normal upstream from our measured interval to estimate the shock normal angle  
 242  $\theta_{Bn}$ . In Geocentric Solar Ecliptic (GSE) coordinates, the *MMS* burst-mode interval at 7:24:28  
 243 occurs at  $(9.59, -4.00, -0.97)R_E$ , where the radius of the Earth is  $R_E = 6378$  km. Using a  
 244 model of the Earth’s bow shock [s9], we estimate the bow shock crossing position as the posi-  
 245 tion directly toward the Sun in the GSE  $x$  direction at  $(13.36, -4.00, -0.97)R_E$ , with a shock  
 246 normal unit vector in GSE coordinates of  $(0.986, -0.160, -0.039)$ . During this time, the *ACE*  
 247 spacecraft was monitoring the upstream solar wind conditions at the L1 point with a position  
 248  $(235.17, 0, 0)R_E$ . The solar wind velocity measured at *ACE* in the hour before the *MMS* mea-  
 249 surements is fairly steady at approximately 600 km/s, and the solar wind flow velocity in the  
 250 magnetosheath downstream of the bow shock measured during the *MMS* interval is 112 km/s.  
 251 Together, the travel time for the solar wind plasma to flow from *ACE* through the bow shock to  
 252 the position of *MMS* is estimated to be 42.6 min. Making the assumption the direction of the  
 253 magnetic field (frozen into the solar wind flow) does not change from the position of *ACE* to  
 254 the bow shock, using the magnetic field direction at *ACE* at time 06:41:52, we obtain a shock-  
 255 normal angle of  $\theta_{Bn} = 15^\circ \pm 7^\circ$ , where the standard deviation is taken over a four minute  
 256 interval centered at that time. This estimate puts the upstream conditions of the shock into the  
 257 regime of quasiparallel shocks with  $\theta_{Bn} < 45^\circ$ , seemingly in contradiction with the need for a  
 258 more perpendicular shock crossing to lead to the measurements of  $T_{\perp i}/T_{\parallel i} > 1$ .

259 Of course, estimating the local direction of the magnetic field at the bow shock crossing up-  
 260 stream of our measured *MMS* interval in the magnetosheath using data from the *ACE* spacecraft  
 261 at position  $235.17R_E$  and at a time 42.6 min earlier carries significant uncertainties. In addition,  
 262 quasiparallel shocks at sufficiently high Mach numbers lead to significant upstream perturba-  
 263 tions that can lead to large local changes of the magnetic field direction at the shock crossing  
 264 [s10, s11, s12]. The *ACE* data give an upstream magnetic field magnitude of  $|\mathbf{B}| \sim 6$  nT and  
 265 we estimate the upstream proton number density of  $n_i \sim 2$  cm $^{-3}$ , so the Alfvén velocity is  
 266  $v_A = 93$  km/s, leading to an Alfvén Mach number of  $M_A \sim 6.4$ . At this supercritical Mach  
 267 number [s13], particle reflection at the shock can indeed lead to significant upstream fluctu-  
 268 ations, so the local shock normal angle  $\theta_{Bn}$  upstream of the measured *MMS* interval could  
 269 possibly have had a much larger  $\theta_{Bn} > 45^\circ$ , leading to the local generation of the sufficiently  
 270 large ion temperature anisotropy  $T_{\perp i}/T_{\parallel i} > 1$  to generate the ICWs that were observed. Though  
 271 we do not have any clear confirmation of conditions that we expect would generate such a per-  
 272 pendicular temperature anisotropy, we cannot rule out such upstream conditions at the shock.  
 273

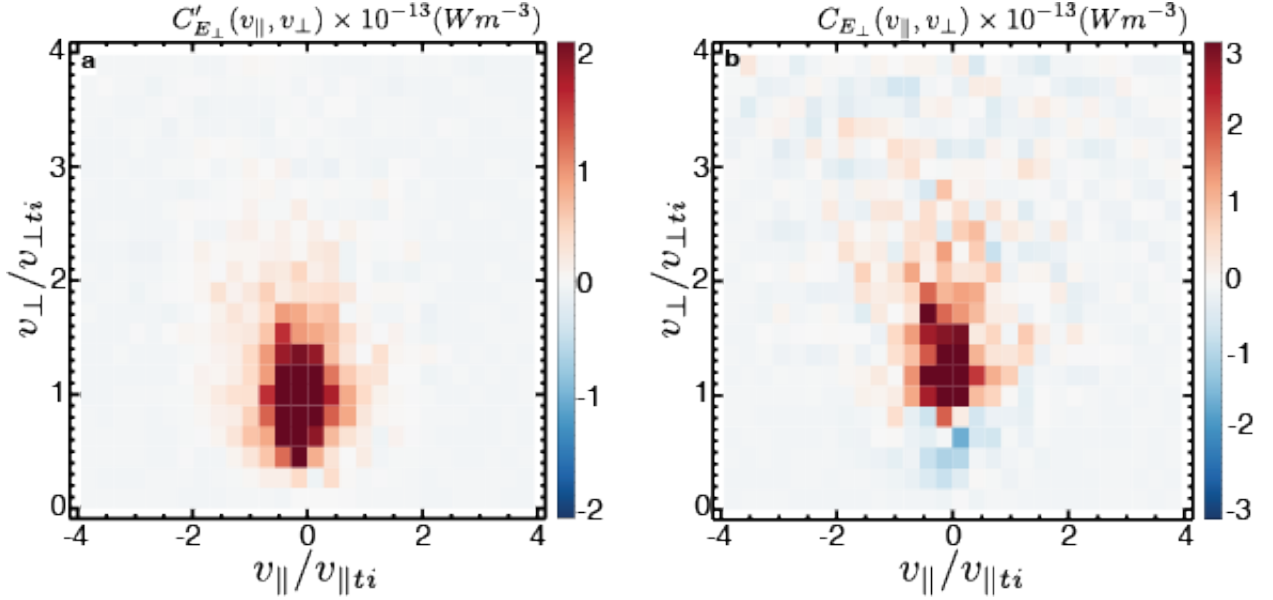

Figure S8: **Standard vs. alternative field-particle correlation.** **a** Alternative field-particle correlation  $C'_{E_{\perp}}(v_{\parallel}, v_{\perp}; \tau)$  and **b** field-particle correlation  $C_{E_{\perp}}(v_{\parallel}, v_{\perp}; \tau)$  shown for  $\tau = 77$  s.

274 **S5. Observation of 2V Gyrotropic  $C'_{E_{\perp}}(v_{\parallel}, v_{\perp})$  and  $C_{E_{\perp}}(v_{\parallel}, v_{\perp})$**

275

276 The intermediate step in the computation of the field-particle correlation  $C_{E_{\perp}}(v_{\parallel}, v_{\perp})$  is  
 277 the computation of the alternative field-particle correlation  $C'_{E_{\perp}}(v_{\parallel}, v_{\perp})$  using Eq. 5 of the  
 278 manuscript. In Fig. S8a we show  $C'_{E_{\perp}}(v_{\parallel}, v_{\perp})$  and in Fig. S8b we show  $C_{E_{\perp}}(v_{\parallel}, v_{\perp})$ .

279 **S6. Collisionless Damping Rates for the Anisotropic Turbulent Cascade**

280

281 In Fig. S9, we plot (a) the normalized frequency  $\omega/k_{\parallel}v_A$  and (b) the normalized collisionless  
 282 damping rate  $-\gamma/\omega$  for the anisotropic fluctuations ( $k_{\perp} \gg k_{\parallel}$ ) of the large-scale turbulent  
 283 cascade over the range at  $10^{-2} \leq k_{\perp}\rho_{\perp i} \leq 10^2$  for  $k_{\parallel}\rho_{\perp i} = 10^{-3}$  with the plasma parameters  
 284  $\beta_{\parallel i} = 0.383$ ,  $T_{\parallel i}/T_{\parallel e} = 6.84$ ,  $T_{\perp e}/T_{\parallel e} = 0.973$ ,  $v_{\parallel ti}/c = 7.34 \times 10^{-4}$ , and with dashed lines  
 285 corresponding to  $T_{\perp i}/T_{\parallel i} = 2.43$  and solid lines corresponding to  $T_{\perp i}/T_{\parallel i} = 1$ . Note that,  
 286 in the limit  $k_{\perp} \gg k_{\parallel}$  that is relevant to the fluctuations of the large-scale turbulent cascade,  
 287 the normalized damping rate  $-\gamma/\omega$  is independent of the value of  $k_{\parallel}$  as long as  $k_{\parallel}d_i \lesssim 1$ .  
 288 In Fig. S9(b), the total normalized damping rate  $-\gamma/\omega$  (black) is decomposed into ion  $-\gamma_i/\omega$   
 289 (red) and electron  $-\gamma_e/\omega$  (blue) contributions, both of which are dominated by collisionless  
 290 damping via the Landau resonance for these plasma parameters. The critical finding here is

291 that collisionless damping via the Landau resonance for the ions is very weak, with  $-\gamma/\omega \lesssim$   
 292  $4 \times 10^{-3}$ , due to the fact that the low  $\beta_{\parallel i} = 0.383$  leads to a parallel phase velocity for Alfvén  
 293 waves that falls in the tail of the ion velocity distribution.

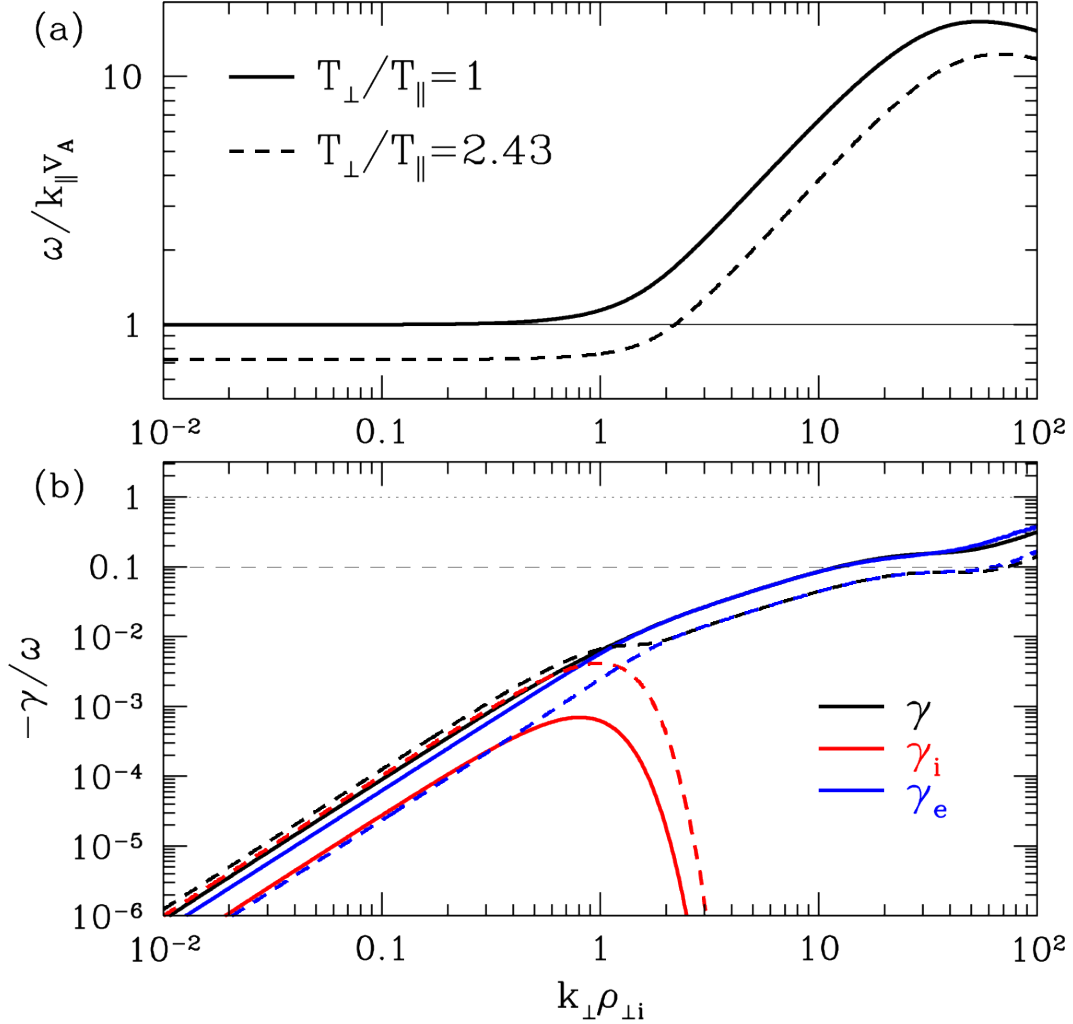

Figure S9: **Alfvén wave frequency and damping rate.** From the linear dispersion relation for Alfvén waves, (a) the normalized frequency  $\omega/k_{\parallel}v_A$  and (b) the normalized collisionless damping rate  $-\gamma/\omega$  for the parameters of the large-scale cascade with a typical wavevector anisotropy  $k_{\perp} \gg k_{\parallel}$ . In this limit, ion damping is dominated by the Landau resonance (Landau and transit-time damping), and the ion contribution to the normalized damping rate  $\gamma_i/\omega$  is given by the red curves for  $T_{\perp i}/T_{\parallel i} = 1$  (solid) and  $T_{\perp i}/T_{\parallel i} = 2.43$  (dashed). Significant collisionless damping occurs when  $-\gamma_i/\omega \gtrsim 0.1$ , but here the maximum damping rates for ions have  $\gamma_i/\omega \lesssim 4 \times 10^{-3}$ , yielding very weak ion damping.



## References

- [s1] Klein, K. G. & Howes, G. G. Predicted impacts of proton temperature anisotropy on solar wind turbulence. *Phys. Plasmas* **22**, 032903 (2015). 1503.00695.
- [s2] Kunz, M. W., Schekochihin, A. A., Chen, C. H. K., Abel, I. G. & Cowley, S. C. Inertial-range kinetic turbulence in pressure-anisotropic astrophysical plasmas. *J. Plasma Phys.* **81**, 325810501 (2015). 1501.06771.
- [s3] Squire, J. *et al.* High-frequency heating of the solar wind triggered by low-frequency turbulence. *Nature Astron.* **6**, 715–723 (2022). 2109.03255.
- [s4] Walters, J. *et al.* The effects of nonequilibrium velocity distributions on alfvén ion-cyclotron waves in the solar wind. *Astrophys. J.* **955**, 97 (2023). URL <https://dx.doi.org/10.3847/1538-4357/acf1fa>.
- [s5] Verscharen, D. *et al.* ALPS: the Arbitrary Linear Plasma Solver. *J. Plasma Phys.* **84**, 905840403 (2018). 1803.04697.
- [s6] Howes, G. G., Klein, K. G. & TenBarge, J. M. Validity of the Taylor Hypothesis for Linear Kinetic Waves in the Weakly Collisional Solar Wind. *Astrophys. J.* **789**, 106 (2014). 1405.5460.
- [s7] Gary, S. P., Montgomery, M. D., Feldman, W. C. & Forslund, D. W. Proton temperature anisotropy instabilities in the solar wind. *J. Geophys. Res.* **81**, 1241–1246 (1976).
- [s8] Hellinger, P., Trávníček, P., Kasper, J. C. & Lazarus, A. J. Solar wind proton temperature anisotropy: Linear theory and WIND/SWE observations. *Geophys. Res. Lett.* **33**, 9101–+ (2006).
- [s9] Farris, M. H., Russell, C. T. & Thomsen, M. F. Magnetic structure of the low beta, quasi-perpendicular shock. *J. Geophys. Res.* **98**, 15285–15294 (1993).
- [s10] Schwartz, S. J. *et al.* Observations of short large-amplitude magnetic structures at a quasi-parallel shock. *J. Geophys. Res.* **97**, 4209–4227 (1992).
- [s11] Lucek, E. A., Horbury, T. S., Dandouras, I. & Rème, H. Cluster observations of the Earth’s quasi-parallel bow shock. *J. Geophys. Res.* **113**, 7 (2008).
- [s12] Caprioli, D. & Spitkovsky, A. Simulations of Ion Acceleration at Non-relativistic Shocks. I. Acceleration Efficiency. *Astrophys. J.* **783**, 91 (2014). 1310.2943.
- [s13] Kennel, C. F. Critical Mach numbers in classical magnetohydrodynamics. *J. Geophys. Res.* **92**, 13427–13437 (1987).
